# Supplementary material
Source: HighWire-hosted journal article supplement (https://jnis.bmj.com/content/10/5/467)
Supplement: inline-supplementary-material-2 [file inline-supplementary-material-2.pdf]

|         | Fetus Sex | GA (Mother Age, Gravidity and Parity) at first detection | Presenting Diagnosis                      | Modalities (MR, US) fetal = "f" | Arteriovenous Communication (pre/postnatal, angio vs US)      | Presentation Size (AP X TR X CC) cm | DSM spontaneous decrease | Thrombus Spontaneous decrease | Management                               | Complications (Hydrocephalus, CHF/hydrops, Infarction)                                      | Outcome             | Trajectory DSM                                        | Trajectory Clot | Trajectory % DSM clot | Arterialization                      | DSM Laterality | Clot Location                                                 | Scar Location                    | Mode of Delivery | DSM Present at delivery?                        |
|---------|-----------|----------------------------------------------------------|-------------------------------------------|---------------------------------|---------------------------------------------------------------|-------------------------------------|--------------------------|-------------------------------|------------------------------------------|---------------------------------------------------------------------------------------------|---------------------|-------------------------------------------------------|-----------------|-----------------------|--------------------------------------|----------------|---------------------------------------------------------------|----------------------------------|------------------|-------------------------------------------------|
| Case 1  | M         | 33 weeks 5 days (38, G2P0)                               | VOGM                                      | fUS, fMR, MR, XA                | Y                                                             | 3.4 x 2.0 x 2.3 cm                  | Y                        | Y                             | Expectant, embolization @ 4mo and 30 mos | VM, mild CHF transiently as a neonate                                                       | A through 30 mo     | BC(AA)                                                | AA(CC)          | 10/0/0/(5/5)          | CC(CA)                               | midline        | left ventral                                                  | left ventral                     | C/S @ 40+2       | Y                                               |
| Case 2  | F         | 28 week 0 days (29, G3P1)                                | Arachnoid cyst                            | fUS, fMR                        | N                                                             | 3.9 x 3.6 x 6.6 cm                  | N                        | Y                             | ETOP                                     | OBO for infarction                                                                          | -                   | BBC                                                   | CBA             | 10/5/10/5             | 0/0/0/0                              | midline        | right ventral                                                 | NA                               | -                | -                                               |
| Case 3  | M         | 18 weeks 5 days (34, G1P0)                               | Arachnoid cyst                            | fUS, fMR                        | N                                                             | 2.0 x 2.7 x 3.3 cm                  | N                        | N                             | ETOP                                     | N                                                                                           | -                   | C                                                     | B               | 0/30                  | 0/0                                  | right          | right posterior/two-tone T2 hyperintensity (center bright and | NA                               | -                | -                                               |
| Case 4  | F         | 28 weeks 4 days (30, G1P0)                               | Solid mass versus hematoma                | fUS, fMR                        | N                                                             | 3.7 x 4.5 x 5.4 cm                  | Y                        | Y                             | Expectant                                | N                                                                                           | A through 8mo       | AC(AA)                                                | BB(AA)          | 50/60/70/(30/0)       | 0                                    | midline        | left ventral//2 tone                                          | left ventral                     | IOL @ 37         | Y                                               |
| Case 5  | F         | 21 weeks 1 day (37, G2P2)                                | Solid mass versus hematoma                | fUS, fMR, MR, US, CT            | N (no antenatal Doppler)                                      | 2.0 x 3.1 x 3.1 cm                  | Y                        | Y                             | Expectant                                | N                                                                                           | A through 8mo       | BA(A)                                                 | BA(A)           | 40/60/100/0           | serpiginous vessels, big scalp veins | midline        | posterior//2 tone                                             | posterior (intradural fluid)     | unclear @ 38wk   | uncertain: last imaging 5 weeks before delivery |
| Case 6  | M         | 20 weeks (33, G3P1)                                      | Arachnoid cyst versus mega cisterna magna | fUS, fMR                        | N (pulsatile flow in transverse sinuses possibly physiologic) | 2.3 x 3.2 x 3.8 cm                  | NA (single timepoint)    | NA (single timepoint)         | ETOP                                     | N                                                                                           | -                   | single                                                | single          | 0-10                  | 0                                    | midline        | peripheral                                                    | NA                               | -                | -                                               |
| Case 7  | M         | 24 week 5 days (17, G1P0)                                | Solid mass versus hematoma                | fUS, fMR, MR, CT                | N                                                             | 2.1x 3.6 x 3.4 cm                   | Y                        | Y                             | Expectant                                | ? Left germinal matrix hemorrhage                                                           | A through 1 year    | (ACC)                                                 | (ACC)           | 40/(10/10/10)         | N                                    | right          | right ventral//2 tone                                         | right lateral (intradural fluid) | SVD              | unclear                                         |
| Case 8  | M         | 20 weeks (34, G3P0A2)                                    | Posterior fossa cyst                      | fUS, fMR                        | N (pulsatile flow in transverse sinuses possibly physiologic) | 3.3 x 2.6 cm (US)                   | Y                        | Y                             | Expectant                                | VM and PF mass effect                                                                       | A through 18 months | BCA(CA)                                               | BBA(CA)         | 20/70/(90/50)         | Y/Y /N (N)                           | leftward       | posterior//2 tone                                             | leftward incorporation           | C/S @ 39+3       | Y                                               |
| Case 9  | M         | 22 weeks (34, G5P3)                                      | Venous malformation                       | fMR, MR                         | N                                                             | 1.8 x 3.6 x 4.4 cm                  | Y                        | Y                             | Expectant                                | Right subependymal vein varix and germinal matrix hemorrhage; right cortical vein dilation; | A through 10 months | (AAC) (subependymal varix resolved entirely at birth) | (AAC)           | 40/(5/0/0)            | N                                    | midline        | posterior//2 tone at 26 weeks                                 | posterior (intradural fluid)     | C/S @ term       | minimal                                         |
| Case 10 | F         | 5 mo postnatal                                           | Dural sinus thrombosis                    | MR, XA                          | Y                                                             | 4.5 x 5.1 x 9.8 cm                  | N (intervened)           | N (intervened)                | Embolization, anticoagulation            | VM, ICP                                                                                     | A through 6 years   | (CAAA)                                                | (BAAA)          | (70/100/20/0)         | Y                                    | midline        | whole lumen                                                   | looks like an occluded segment   | SVD              | uncertain                                       |
| Case 11 | F         | 11 mo postnatal                                          | Venous malformation                       | MR, XA, CT                      | Y                                                             | 3.6 x 4.2 x 9.4 cm                  | N (intervened)           | N (intervened)                | Staged embolization                      | VM, developmental delay at presentation with normalization after interventions              | A through 10 yo     | (ACCCC*)                                              | (CNaNaCC*)      | (5/5/Na/Na/5/5/5)     | Y                                    | midline        | superior sagittal sinus                                       | superior sagittal sinus          | C/S              | uncertain                                       |
| Case 12 | F         | 2 mo postnatal                                           | Possible sinus pericranii                 | MR, US, XA                      | N                                                             | 2.5 x 1.6 x 2.8 cm                  | Y                        | Y                             | Expectant                                | Facial Vein prominence                                                                      | A through 7mo       | (A)                                                   | (A)             | (100/100)             | N                                    | midline        | whole lumen                                                   | NA                               | SVD @35 weeks    | uncertain                                       |

parentheses denote postnatal data

fUS= fetal ultrasound; fMR = fetal MR; MR, US, CT= postnatal MR, US, or CT; XA=postnatal catheter angiography
